# Supplementary material for: Decreased Frequency of Circulating Myelin Oligodendrocyte Glycoprotein B Lymphocytes in Patients with Relapsing-Remitting Multiple Sclerosis
Source: Hindawi journal article supplement (doi:10.1155/2015/673503), 2015-01-01
Supplement: f1 [file 673503.f1.pdf]

## Supplementary Figure 1: Reactivity of the 8-18 C5 antibody and MOG

**a)** - Beads were incubated with anti-MOG antibody 8-18C5 for 30 minutes and a fluorescent secondary antibody was added to reveal the MOG coated beads. Beads coated with MOG are recognized by the 8-18C5 antibody.

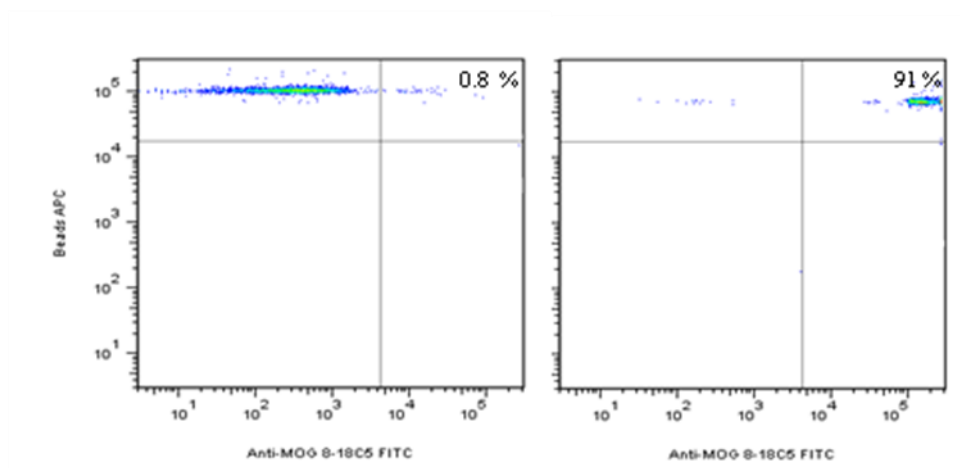

*Supplementary figure 1a:* Fluorescent beads were coated or not with MOG, and tested for 8-18C5 anti-MOG antibody binding. Beads without protein were not recognized by the antibody (0.8%). 91% of MOG coated beads are revealed by the 8-18C5 antibody

**b)** - Splenocytes from IgH-MOG transgenic mice were used to assess the potential of B cells to recognize specifically MOG coated beads. B cells which recognized MOG-Beads then were tested for the inhibition of this recognition using soluble MOG. Transgenic BCR recognized specific MOG and soluble MOG can inhibit recognition.

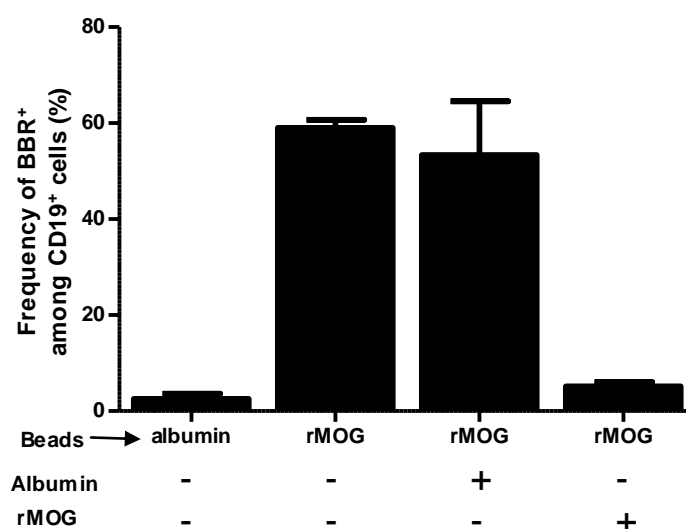

*Supplementary Figure 1b:* Splenocytes were incubated with MOG-beads or albumin beads. To test this recognition, 20µg of soluble MOG or soluble albumin was added before incubation with MOG-beads. Only pre-incubation with soluble MOG blocks the interaction between B cells and MOG-beads.

**Supplementary Figure 2: Phenotype of B cells and MOG BBR subsets in MS and HI.**

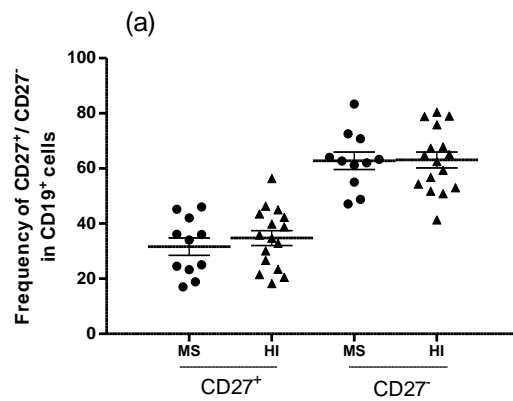

*Supplementary figure 2a: B cells stained by CD19 and CD27 were incubated with MOG coated beads. Memory (CD27<sup>+</sup>) and naïve B cells (CD27<sup>-</sup>) were assessed in RRMS (n=11) and HI (n=16). No significant difference was observed between RRMS and HI for memory or naïve subsets distribution. (Mann whitney test, p>0.05).*

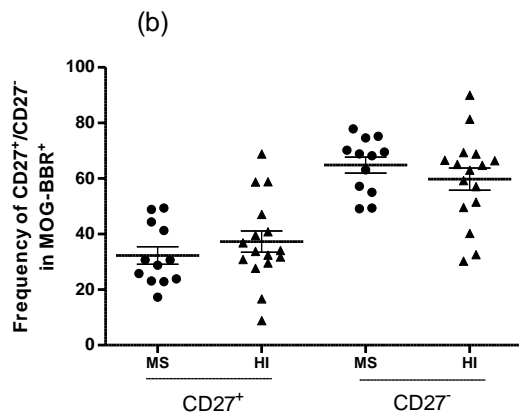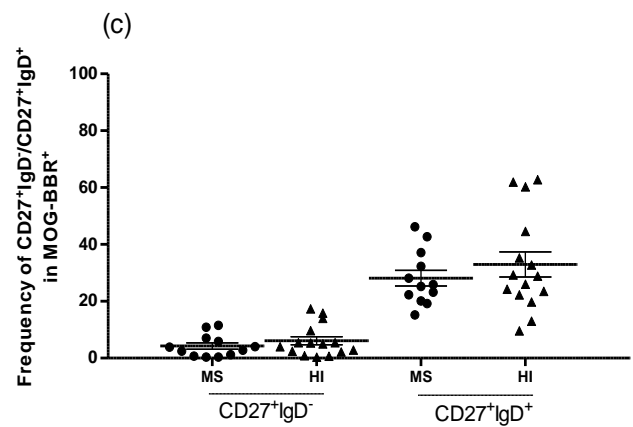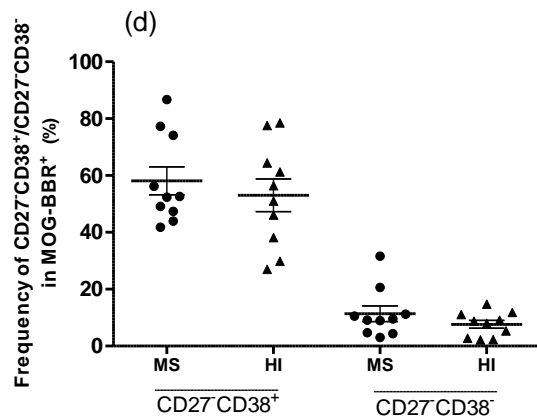

Supplementary figure 2b, 2c, 2d: B cells stained by CD19, CD27, IgD and CD38 antibodies were incubated with MOG coated beads. The frequency of memory (CD27<sup>+</sup>) and naïve (CD27<sup>-</sup>) MOG-BBR subset in MS (n=12) and HI (n=16) is represented. No statistical differences are observed between MS and HI in memory and naïve sub-populations (*Mann whitney test*) (b). The frequency of switched (CD27<sup>+</sup>IgD<sup>-</sup>) and unswitched (CD27<sup>+</sup>IgD<sup>+</sup>) memory MOG-BBR subsets was assessed in MS patients (n=12) and HI (n=15). No statistically significant difference was observed either (*Mann whitney test*) (c). In naïve compartment, the Frequency of CD27<sup>-</sup>CD38<sup>+</sup> (activated-naïve B cells) and CD27<sup>-</sup>CD38<sup>-</sup> (Mature naïve B cells) among MOG-BBR in MS patients (n=10) and HI (n=10) was represented. No difference was observed between MS and HI for each subset (*Mann whitney test*) (d).

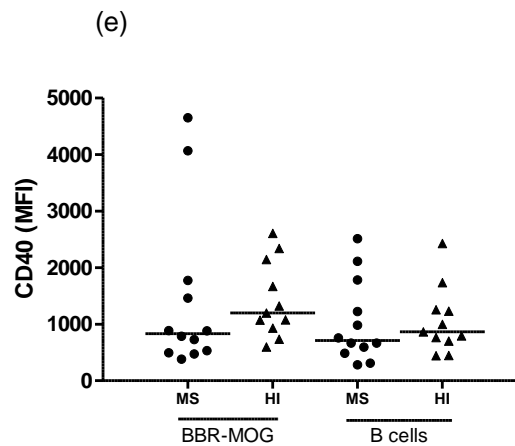

Supplementary figure 2e: B cells labeled with CD40 antibody were incubated with MOG coated beads to assess the MFI of this activation marker on B cells. The fluorescent intensity of CD40 labeling in MOG-BBR subset and B cells is represented. No statistical difference was observed between MS (n=12) and HI (n=11) (*Kruskal-wallis test*).

### Supplementary Figure 3: Anti-MOG antibody detection

a)- Analyses were performed as described in (Di Pauli et al. 2011).

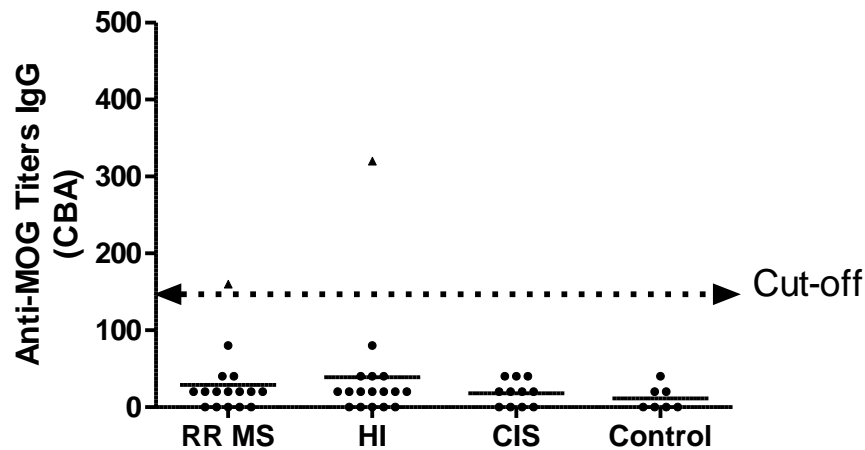

*Supplementary figure 3a:* Plasma samples from MS patients (n=16), HI (n=17), CIS (n=11) and controls (n=7) were tested for the presence of MOG IgG by immunofluorescence cell-based assay with human MOG expressed in HEK293 cells (positive cut-off 1:160).

b) - Correlation between the frequency of MOG-specific B cells and anti-MOG IgG titers.

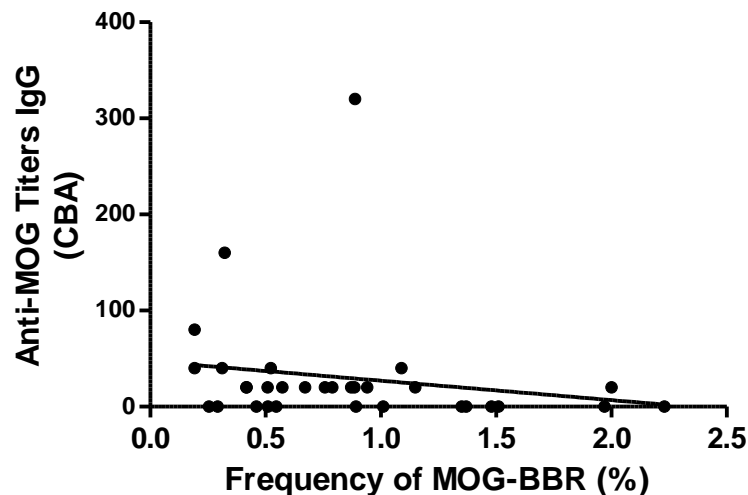

*Supplementary figure 3b:* The titers of MOG IgG are represented according to the frequency of MOG specific B cells for a subset of MS patients and HI. We performed the linear regression,  $r=0.032$  for 32 values.
